# Supplementary material for: Biochar-augmented biofilters to improve pollutant removal from stormwater – can they improve receiving water quality?
Source: Royal Society of Chemistry journal article supplement (doi:10.1039/d0ew00027b), 2020-01-01
Supplement: d0ew00027b1.pdf [file d0ew00027b1.pdf]

## 1 Electronic Supplementary Information

2 Water quality data in the boxplots of Figure 1 were taken from the National Surface Water  
 3 Quality Database (NSQD) v.4.02, released in January 2015, downloaded from  
 4 [www.bmpdatabase.org](http://www.bmpdatabase.org). The federal standards and recommended criteria, reported in Table S1,  
 5 were taken from three EPA websites and reported referenced therein (also referenced in the main  
 6 body text):

- 7 • Drinking water standards from National Primary Drinking Water Regulations:  
 8 [https://www.epa.gov/ground-water-and-drinking-water/national-primary-drinking-water-](https://www.epa.gov/ground-water-and-drinking-water/national-primary-drinking-water-regulations)  
 9 [regulations](https://www.epa.gov/ground-water-and-drinking-water/national-primary-drinking-water-regulations)
- 10 • Aquatic life recommended criteria: [https://www.epa.gov/wqc/national-recommended-](https://www.epa.gov/wqc/national-recommended-water-quality-criteria-aquatic-life-criteria-table)  
 11 [water-quality-criteria-aquatic-life-criteria-table](https://www.epa.gov/wqc/national-recommended-water-quality-criteria-aquatic-life-criteria-table)
- 12 • Recreational criteria: <https://www.epa.gov/wqc/2012-recreational-water-quality-criteria>  
 13

14 Table S1. Federal standards and recommended criteria for water quality parameter in figure 1.

| Water quality parameter in figure 1 | Water quality parameter name in the NSQD                               | Notes or assumptions regarding the standards or criteria plotted                                                                                                                                                                                |
|-------------------------------------|------------------------------------------------------------------------|-------------------------------------------------------------------------------------------------------------------------------------------------------------------------------------------------------------------------------------------------|
| Ammonium                            | Ammonia (mg/L)                                                         | <ul style="list-style-type: none"> <li>• Acute freshwater standard sampled over 1 hour average</li> <li>• Chronic freshwater standard 30 day rolling average</li> <li>• Saltwater standards vary with pH, temperature so not plotted</li> </ul> |
| Nitrate                             | NO <sub>2</sub> <sup>-</sup> +NO <sub>3</sub> <sup>-</sup> (mg/L as N) |                                                                                                                                                                                                                                                 |
| <i>E. coli</i>                      | Total <i>E. coli</i> (colony forming units/100 mL)                     | <ul style="list-style-type: none"> <li>• Recreation standard is the geometric mean of samples taken, assuming an estimated illness rate of 36 per 1,000 primary contact recreators.</li> </ul>                                                  |
| Dissolved copper                    | Copper Filtered (µg/L)                                                 |                                                                                                                                                                                                                                                 |
| Dissolved lead                      | Lead Filtered After 1984 (µg/L)                                        | <ul style="list-style-type: none"> <li>• Aquatic life criteria for freshwater are a function of hardness, the values plotted assume a hardness of 100 mg/L</li> </ul>                                                                           |
| Zinc                                | Zinc Total (µg/L)                                                      | <ul style="list-style-type: none"> <li>• Assumed “Zinc” aquatic life criteria referred to total Zinc</li> <li>• Drinking water standard is from National Secondary Drinking Water Regulations</li> </ul>                                        |



17 Table S2. Figure 3 was created with data from the International Stormwater BMP Database.  
18 Category names were aggregated from the 'CommonName' field in the database.  
19

| <b>Category Name</b>     | <b>International Stormwater BMP Database<br/>'CommonName' fields</b>                                               |
|--------------------------|--------------------------------------------------------------------------------------------------------------------|
| Phosphate                | Phosphorus, orthophosphate as $\text{PO}_4^{3+}$ ;<br>Phosphorus, orthophosphate as P; Phosphate-<br>phosphorus    |
| Nitrate                  | Nitrogen, Nitrite ( $\text{NO}_2^-$ ) + Nitrate ( $\text{NO}_3^-$ ) as<br>N; Nitrogen, Nitrate ( $\text{NO}_3^-$ ) |
| Fecal indicator bacteria | <i>Escherichia coli</i> ; Fecal coliform                                                                           |

20  
21  
22  
23  
24  
25

The full data recovered during the systematic review is available from a persistent URL:  
<https://purl.stanford.edu/qs993pr7111>

26

27 Table S3. Chemical acronyms used in Figures 4 and 5.

| <b>Acronym</b> | <b>Chemical name</b>               |
|----------------|------------------------------------|
| 2,4-D          | 2,4-Dichlorophenoxyacetic acid     |
| BPA            | Bisphenol-A                        |
| PFOA           | Perfluorooctanoic acid             |
| PFOS           | Perfluorooctanesulfonic acid       |
| TCEP           | Tris(2-chloroethyl) phosphate      |
| TCPP           | Tris (1-chloro-2-propyl) phosphate |

28

29
